# Supplementary material for: Integrated Process Model Applications Linking Bioprocess Development to Quality by Design Milestones
Source: MDPI journal article supplement (doi:10.3390/bioengineering8110156), 2021-10-24
Supplement: s1 [file s1]

# Supplemental Data and Plots

Linking Bioprocess Development to Quality-by-Design Milestones via Digital Twin Applications

## Model tables

Table S1: Overview of identified models based on DoE data. AIC was used as a primary identifier of selected model.  $R^2$ ,  $Q^2$ , RMSE, and  $p$ -values, as well as residual analysis, were used alongside process expertise to determine acceptance of the model within the IPM. All residual variation is accounted for within the prediction interval of the simulated values within the IPM. (+) indicates positive coefficient and (-) indicates negative coefficient.

| Unit Op | Blinded              | Response | Model                 | $R^2$ | $Q^2$ | RMSE  | P      | Parameters                                                                                                                                                                                                     |
|---------|----------------------|----------|-----------------------|-------|-------|-------|--------|----------------------------------------------------------------------------------------------------------------------------------------------------------------------------------------------------------------|
| CAP     | CQA1 <sub>prod</sub> | Main SCX | Quadratic             | 0.45  | 0.34  | 1.119 | 0.019  | (-) Load Density<br>(+) Load Density <sup>2</sup>                                                                                                                                                              |
|         | CQA1 <sub>imp</sub>  | BPG      | Linear                | 0.24  | 0.11  | 0.229 | 0.011  | (-) Residence Time<br>(+) Residence Time                                                                                                                                                                       |
|         | CQA2 <sub>imp</sub>  | HMW SEC  | Quadratic             | 0.67  | 0.57  | 0.309 | 0.0001 | (-) Load Density<br>(+) Load Density <sup>2</sup>                                                                                                                                                              |
| AT      | CQA1 <sub>prod</sub> | Main SCX | Interaction/Quadratic | 0.85  | 0.55  | 0.016 | 0.0001 | (-) Concentration<br>(+) pH AT<br>(-) Hold Time AT<br>(+) Concentration * pH AT<br>(-) Concentration * Hold AT<br>(+) pH AT * Hold AT<br>(-) pH AT <sup>2</sup>                                                |
|         | CQA1 <sub>imp</sub>  | BPG      | Interaction/Quadratic | 0.94  | 0.92  | 0.04  | 0.0001 | (-) Concentration<br>(+) pH AT<br>(-) Hold Time AT<br>(+) Neutr. pH<br>(+) Concentration * pH AT<br>(-) Concentration * Neutr. pH<br>(+) pH AT * Hold AT<br>(-) pH AT <sup>2</sup><br>(+) Hold AT <sup>2</sup> |
|         | CQA2 <sub>imp</sub>  | HMW SEC  | Interaction/Quadratic | 0.92  | 0.89  | 0.672 | 0.0001 | (-) Concentration<br>(+) pH AT<br>(-) Hold Time AT<br>(+) Neutr. Hold Time<br>(-) pH AT * Neutr. Hold<br>(+) Concentration <sup>2</sup><br>(+) Hold AT <sup>2</sup><br>(+) Neutr. Hold <sup>2</sup>            |
|         | CQA3 <sub>imp</sub>  | LMW SEC  | Interaction/Quadratic | 0.43  | 0.12  | 0.031 | 0.0087 | (-) Concentration<br>(+) pH AT<br>(-) Hold Time AT<br>(+) Neutr. Hold Time<br>(-) Neutr. pH<br>(-) Concentration * pH AT<br>(-) Hold AT <sup>2</sup><br>(+) Neutr. pH <sup>2</sup>                             |
|         |                      |          |                       |       |       |       |        | (-) Concentration <sup>2</sup>                                                                                                                                                                                 |
|         |                      |          |                       |       |       |       |        |                                                                                                                                                                                                                |

## Supplemental Data and Plots

## Linking Bioprocess Development to Quality-by-Design Milestones via Digital Twin Applications

| Unit Op             | Blinded              | Response  | Model                   | R <sup>2</sup> | Q <sup>2</sup> | RMSE   | P                                    | Parameters                      |
|---------------------|----------------------|-----------|-------------------------|----------------|----------------|--------|--------------------------------------|---------------------------------|
| AEX                 | CQA1 <sub>prod</sub> | Main SCX  | Interaction             | 0.77           | 0.68           | 0.01   | 0.0001                               | (-) Load Density                |
|                     |                      |           |                         |                |                |        |                                      | (-) Equil. pH                   |
|                     | CQA1 <sub>imp</sub>  | BPG       | Quadratic               | 0.53           | 0.43           | 0.103  | 0.002                                | (+) Load Density * Equil pH     |
|                     |                      |           |                         |                |                |        |                                      | (-) Equil. pH <sup>2</sup>      |
|                     |                      |           |                         |                |                |        |                                      | (+) Equil. pH                   |
|                     |                      |           |                         |                |                |        |                                      | (+) Equil. pH <sup>2</sup>      |
|                     | CQA2 <sub>imp</sub>  | HMW SEC   | Quadratic               | 0.65           | 0.17           | 0.067  | 0.0001                               | (+) Equil. pH                   |
|                     |                      |           |                         |                |                |        |                                      | (-) Equil. Conductivity         |
|                     |                      |           |                         |                |                |        |                                      | (+) Equil. pH <sup>2</sup>      |
|                     |                      |           |                         |                |                |        |                                      | (+) Equil. pH                   |
| CQA3 <sub>imp</sub> | LMW SEC              | Quadratic | 0.54                    | 0.41           | 0.037          | 0.0005 | (-) Equil. Conductivity              |                                 |
|                     |                      |           |                         |                |                |        | (+) Equil. Conductivity <sup>2</sup> |                                 |
| CEX                 | CQA1 <sub>prod</sub> | Main SCX  | Interaction / Quadratic | 0.76           | 0.64           | 0.001  | 0.0001                               | (+) Elu. Conductivity           |
|                     |                      |           |                         |                |                |        |                                      | (+) Load Density                |
|                     |                      |           |                         |                |                |        |                                      | (+) Load Conductivity           |
|                     |                      |           |                         |                |                |        |                                      | (+) Load / Elu. pH              |
|                     |                      |           |                         |                |                |        |                                      | (-) Elu. Cond. * Load / Elu. pH |
|                     |                      |           |                         |                |                |        |                                      | (+) Load Cond. <sup>2</sup>     |
|                     |                      |           |                         |                |                |        |                                      | (-) Load / Elu. pH <sup>2</sup> |
|                     |                      |           |                         |                |                |        |                                      | (-) Elu. Conductivity           |
|                     | CQA1 <sub>imp</sub>  | BPG       | Interaction / Quadratic | 0.77           | 0.65           | 0.068  | 0.0001                               | (-) Load Density                |
|                     |                      |           |                         |                |                |        |                                      | (-) Load / Elu. pH              |
|                     |                      |           |                         |                |                |        |                                      | (+) Elu. Cond. * Load Density   |
|                     |                      |           |                         |                |                |        |                                      | (+) Elu. Cond. * Load / Elu. pH |
|                     |                      |           |                         |                |                |        |                                      | (+) Elu Cond. <sup>2</sup>      |
|                     |                      |           |                         |                |                |        |                                      | (-) Elu. Conductivity           |
|                     |                      |           |                         |                |                |        |                                      | (-) Load / Elu. pH              |
|                     |                      |           |                         |                |                |        |                                      | (-) Elu. Conductivity           |
| CQA2 <sub>imp</sub> | HMW SEC              | Linear    | 0.33                    | 0.22           | 0.598          | 0.0005 | (+) Load Conductivity                |                                 |
|                     |                      |           |                         |                |                |        | (-) Load / Elu. pH                   |                                 |
|                     |                      |           |                         |                |                |        | (-) Elu. Conductivity                |                                 |
|                     |                      |           |                         |                |                |        | (+) Load / Elu. pH                   |                                 |
| CQA3 <sub>imp</sub> | LMW SEC              | Quadratic | 0.4                     | 0.31           | 0.434          | 0.0007 | (+) Load Conductivity                |                                 |
|                     |                      |           |                         |                |                |        | (-) Load Cond. <sup>2</sup>          |                                 |

# Supplemental Data and Plots

Linking Bioprocess Development to Quality-by-Design Milestones via Digital Twin Applications

*Table S2: Overview of models showing a correlation between specific CQA clearances and CQA load (load models). (+) indicates a positive regression line between clearance and load, whereas (-) indicates a negative regression line between clearance and load*

| Unit Operation | CQA                 | R <sup>2</sup> | Effect |
|----------------|---------------------|----------------|--------|
| AT             | CQA1 <sub>imp</sub> | 0.75           | (+)    |
| AEX            | CQA2 <sub>imp</sub> | 0.76           | (+)    |
|                | CQA3 <sub>imp</sub> | 0.70           | (-)    |
| DF             | CQA3 <sub>imp</sub> | 0.76           | (+)    |
| CEX            | CQA1 <sub>imp</sub> | 0.73           | (-)    |
| UFDF           | CQA1 <sub>imp</sub> | 0.95           | (-)    |
|                | CQA2 <sub>imp</sub> | 0.95           | (+)    |

# Supplemental Data and Plots

## Linking Bioprocess Development to Quality-by-Design Milestones via Digital Twin Applications

### Simulation Trend Plots

For all plots below, 1000 runs were simulated over the full process(top) and plotted against the sum of existing real manufacturing data (bottom) as well as the Out-of-Acceptance limit (red). Additionally, given only this information, a PPK result is given for OOA, that is, how likely given the normal distribution around the real and simulated data would be OOA at drug substance, which can be used as a comparative diagnostic of IPM quality.

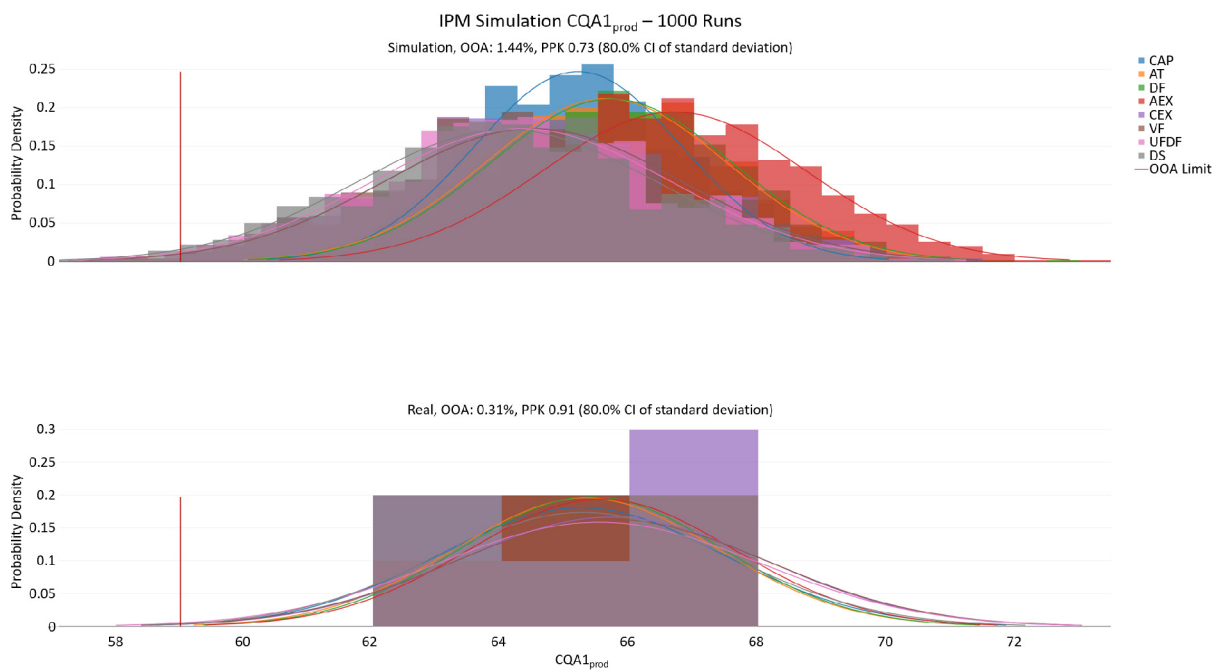

Figure S1: Simulation trend plot for  $CQA1_{prod}$

# Supplemental Data and Plots

Linking Bioprocess Development to Quality-by-Design Milestones via Digital Twin Applications

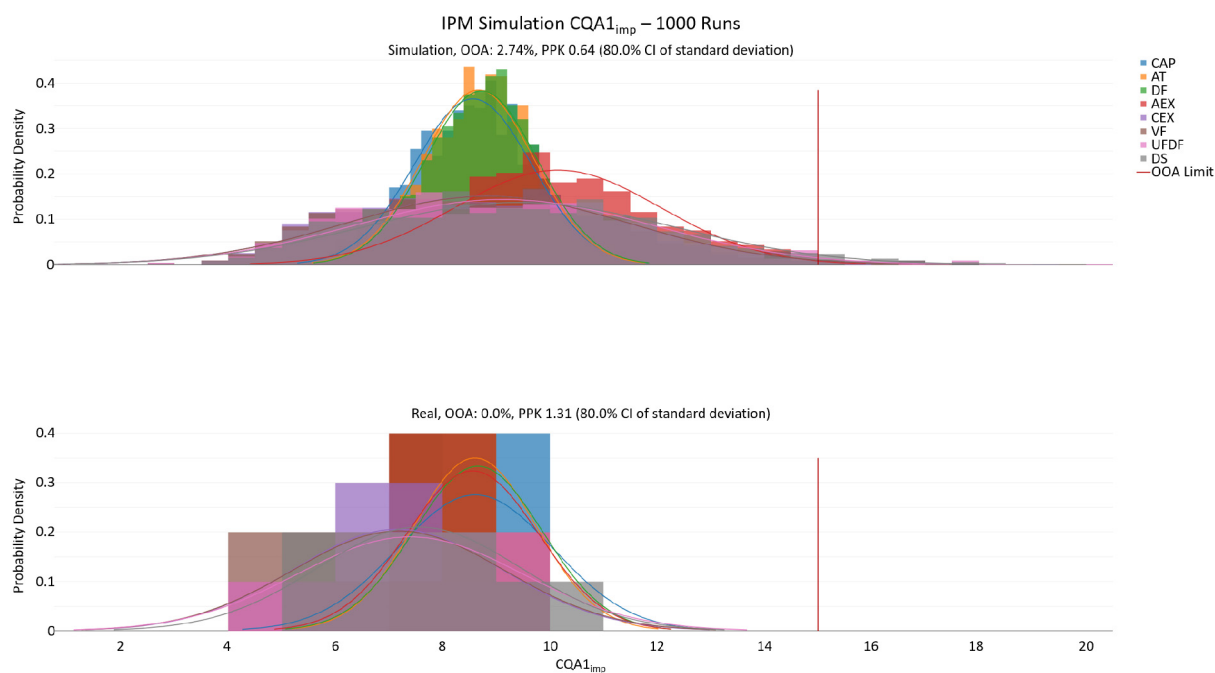

Figure S2: Simulation trend plot for  $CQA1_{imp}$

# Supplemental Data and Plots

Linking Bioprocess Development to Quality-by-Design Milestones via Digital Twin Applications

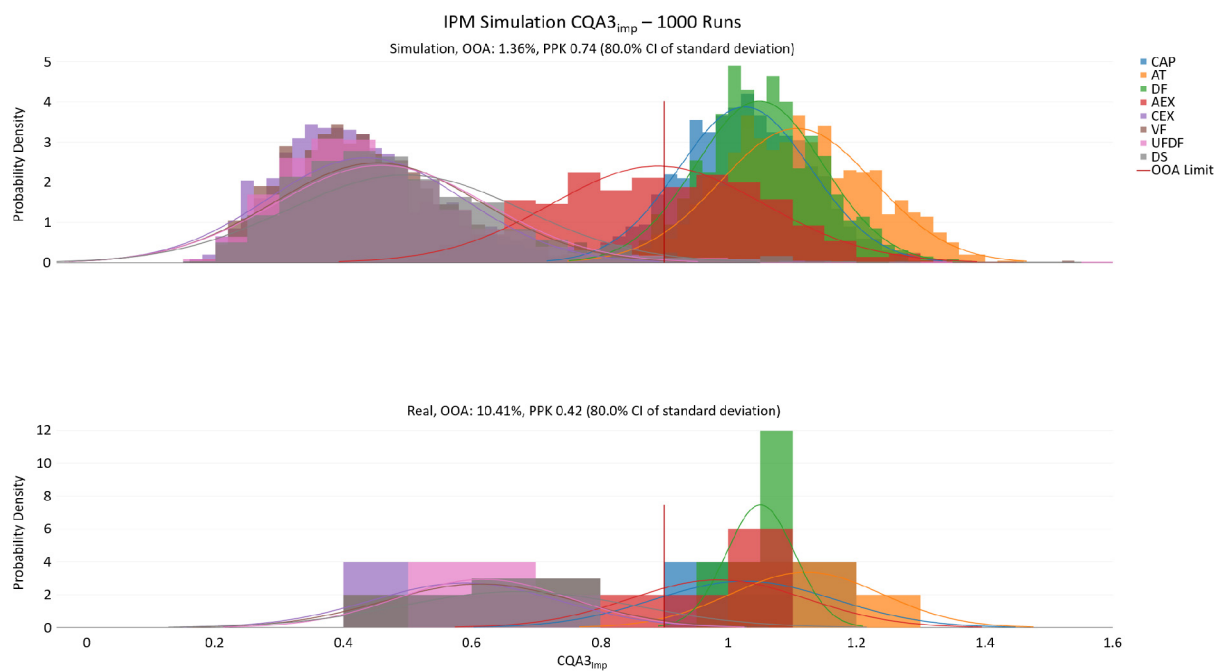

Figure S3: Simulation trend plot for  $CQA3_{imp}$

# Supplemental Data and Plots

Linking Bioprocess Development to Quality-by-Design Milestones via Digital Twin Applications

## PSA CQA Plots

For all plots below, 1000 simulations per grid point were performed over the full process. The results in OOA are plotted across the relative screening range. The screening range is depicted such that 0 is always the set point condition and the remaining screening ranges are coded between -2, 2.

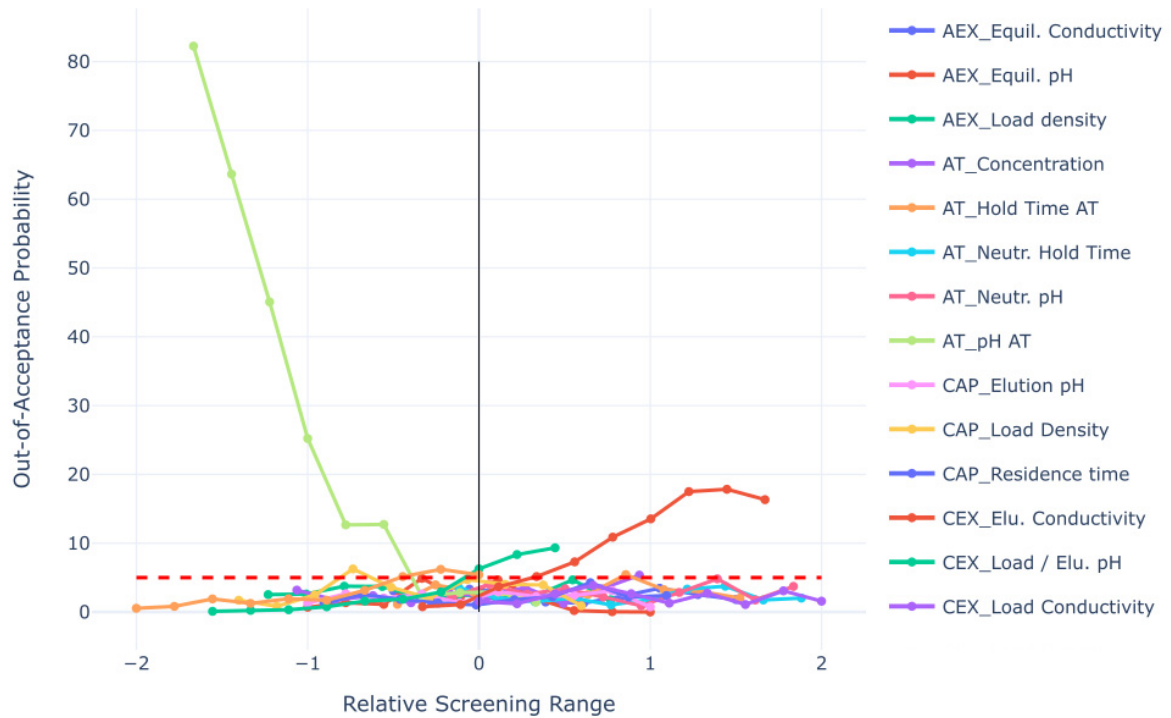

Figure S4: CQA1<sub>imp</sub> CQA PSA plot

# Supplemental Data and Plots

Linking Bioprocess Development to Quality-by-Design Milestones via Digital Twin Applications

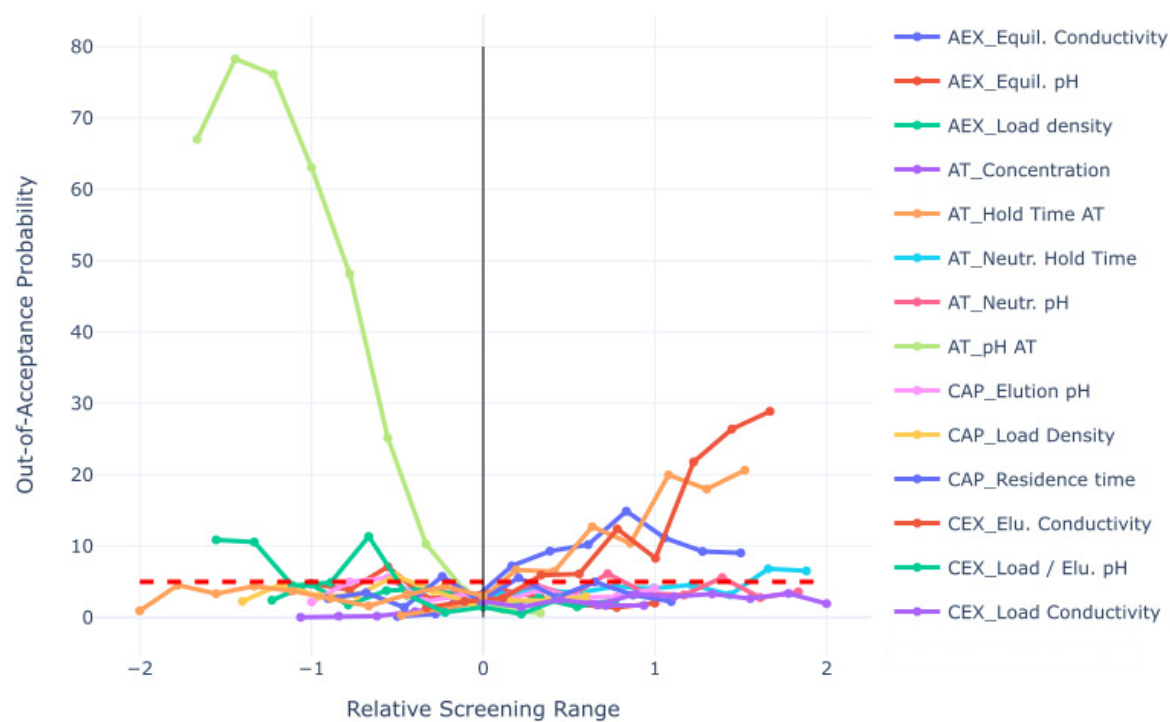

Figure S5: CQA2<sub>imp</sub> CQA PSA plot



# Supplemental Data and Plots

Linking Bioprocess Development to Quality-by-Design Milestones via Digital Twin Applications

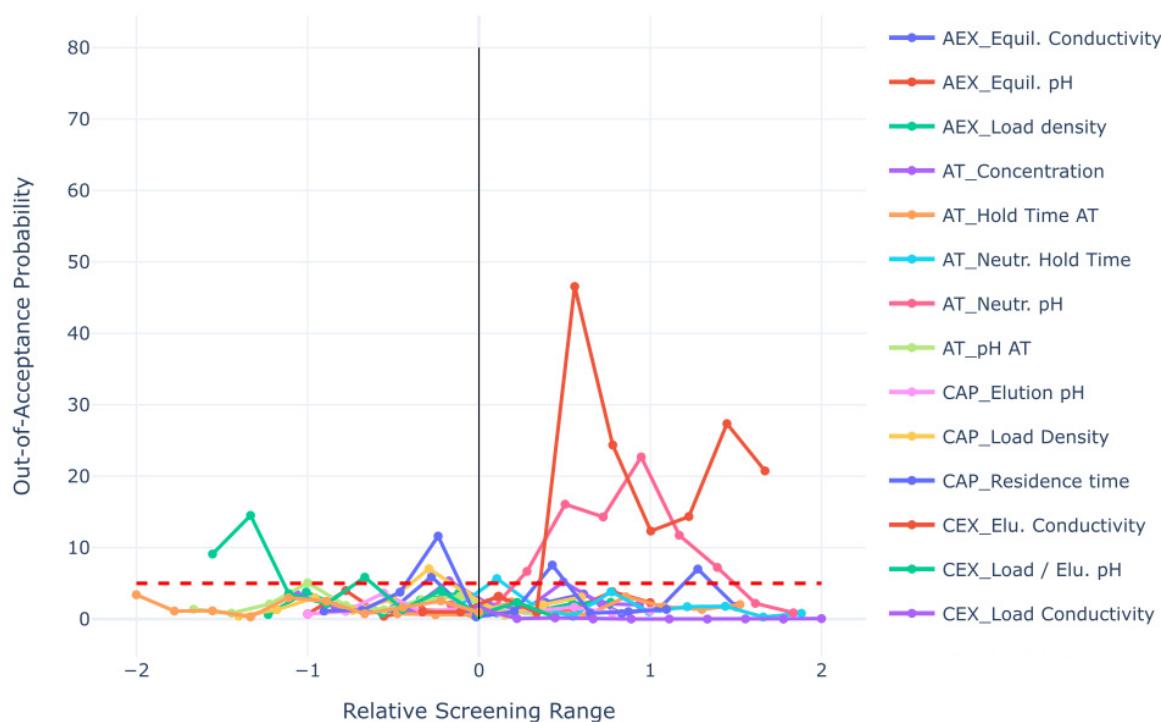

Figure S6: CQA3<sub>imp</sub> CQA PSA plot

# Supplemental Data and Plots

Linking Bioprocess Development to Quality-by-Design Milestones via Digital Twin Applications

## PSA CPP Plots

For all plots below, 1000 simulations per grid point were performed over the full process. The results in OOA are plotted across the individual CPP range. The area is grey is excluded from the proposed manufacturing PAR range.

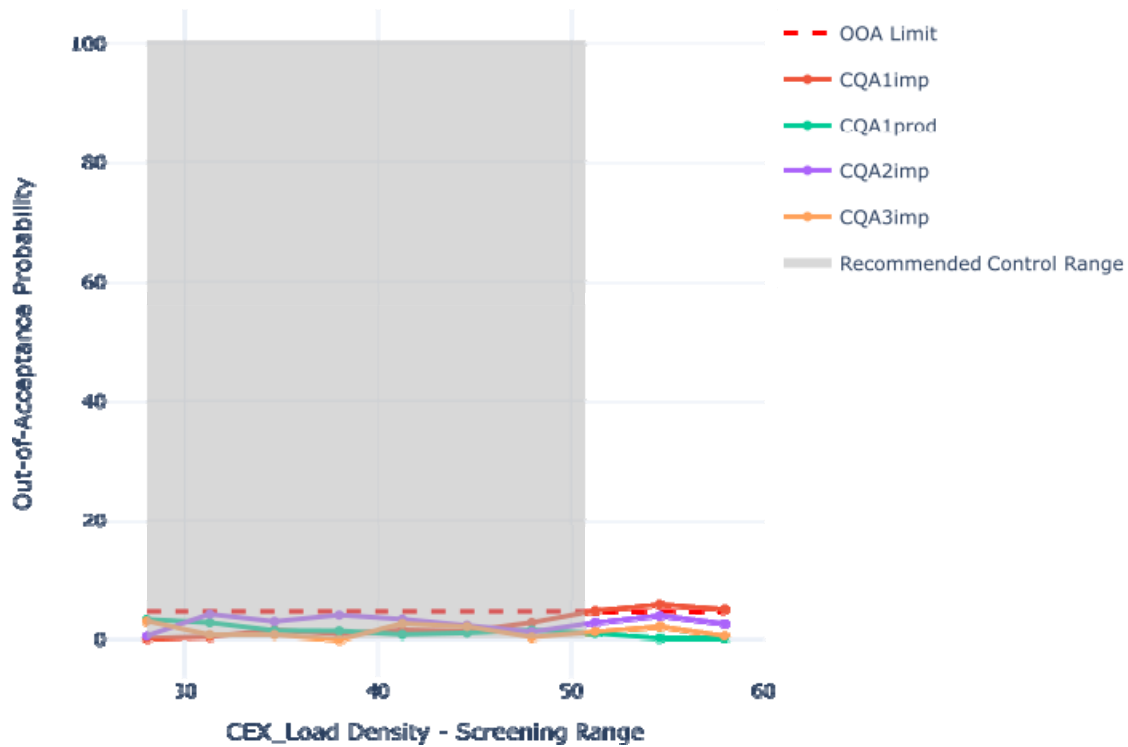

Figure S7: CEX\_Load Density CPP PSA plot

# Supplemental Data and Plots

Linking Bioprocess Development to Quality-by-Design Milestones via Digital Twin Applications

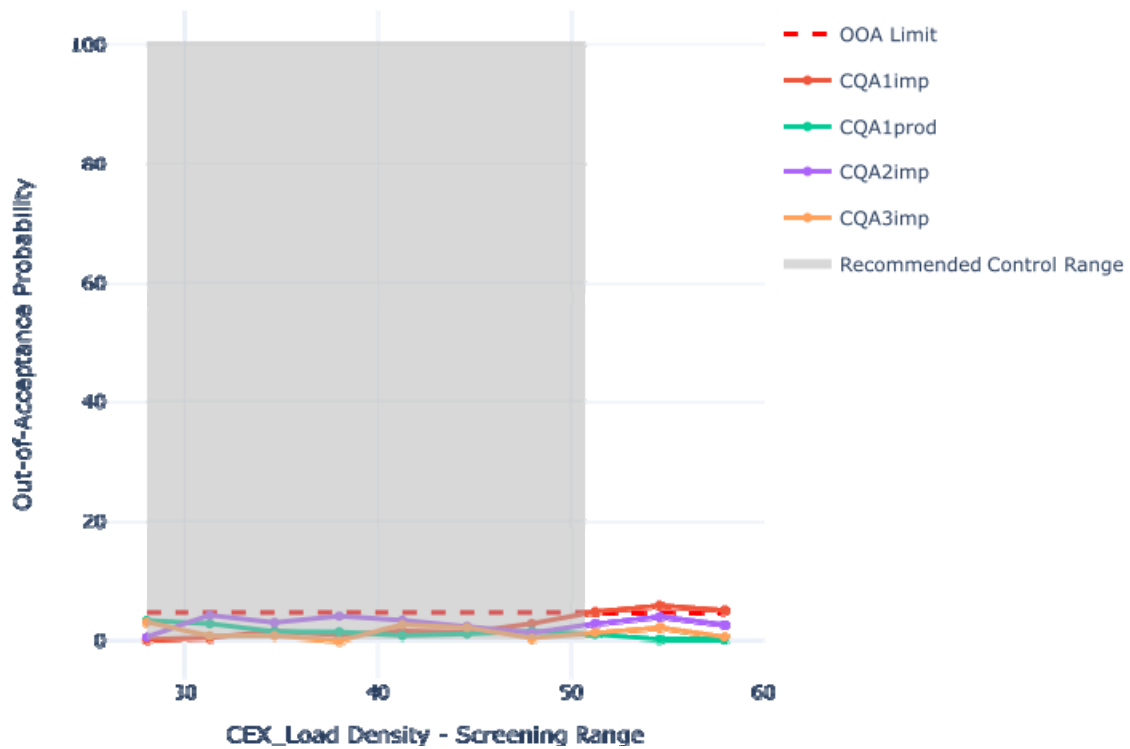

Figure S8: CEX\_Load Density CPP PSA Plot

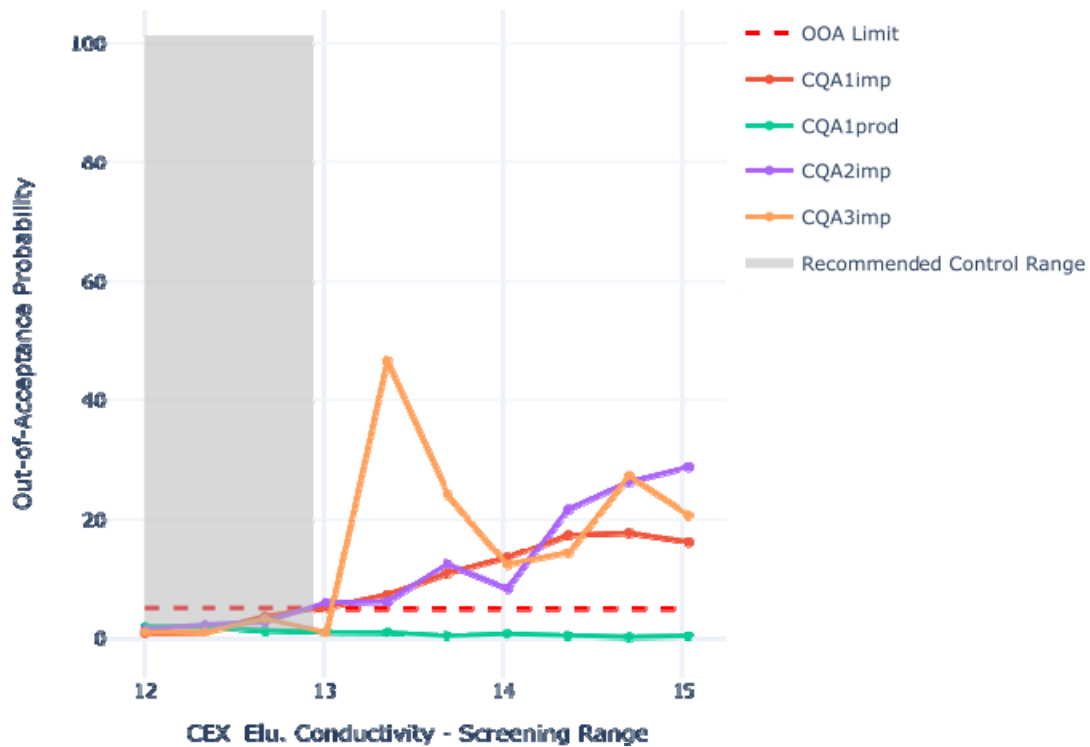

Figure S9: CEX\_Elu. Conductivity CPP PSA plot
